## Minireview: Nuclear Hormone Receptor 4A Signaling: Implications for Metabolic Disease

Michael A. Pearen and George E. O. Muscat

Institute for Molecular Bioscience, The University of Queensland, Queensland 4072, Australia

Numerous members of the nuclear hormone receptor (NR) superfamily have been demonstrated to regulate metabolic function in a cell- and tissue-specific manner. This review brings together recent studies that have associated members of the NR superfamily, the orphan NR4A subgroup, with the regulation of metabolic function and disease. The orphan NR4A subgroup includes Nur77 (NR4A1), Nurr1 (NR4A2), and Nor-1 (NR4A3). Expression of these receptors is induced in multiple tissues by a diverse range of stimuli, including stimuli associated with metabolic function, such as:  $\beta$ -adrenoceptor agonists, cold, fatty acids, glucose, insulin, cholesterol, and thiazolidinediones. *In vitro* and *in vivo* gain- and loss-of-function studies in major metabolic tissues (including skeletal muscle, adipose, and liver cells and tissues) have associated the NR4A subgroup with specific aspects of lipid, carbohydrate, and energy homeostasis. Most excitingly, although these orphan receptors do not have known endogenous ligands, several small molecule agonists have recently been identified. The preliminary studies reviewed in this manuscript suggest that therapeutic exploitation of the NR4A subgroup may show utility against dyslipidemia, obesity, diabetes, and cardiovascular disease. (*Molecular Endocrinology* 24: 1891–1903, 2010)

**NURSA Molecule Pages: Nuclear Receptors: Nur77 | NURR1 | NOR1.**

**M**etabolic diseases such as obesity and type 2 diabetes are major contributors to morbidity and mortality throughout industrialized nations. At the molecular level, a number of nuclear hormone receptors (NRs), which belong to a superfamily of structurally related ligand-dependent transcription factors, have been shown to regulate metabolic function and the pathophysiology of metabolic disease in an organ-specific manner.

This review focuses on the nuclear hormone receptor 4A (NR4A) subgroup in the context of metabolism. Members of this subgroup have recently emerged as regulators of metabolic function both *in vitro* and *in vivo*. In mammals, the NR4A subgroup consists of three closely related orphan nuclear receptors: neuron-derived *clone* 77 [Nur77; NR4A1; also known as NGFI-B, N10, NAK-1, TIS1, 3CH77, and TR3 (1–3)]; nuclear receptor related 1 [Nurr1; NR4A2; also known as RNR-1, NOT, TINUR, and HZF-3 (4)]; and neuron-derived orphan receptor 1 [Nor-1; NR4A3; also known as MINOR, TEC,

and CHN (5–7)]. The NR4A subgroup share significant sequence homology. In humans, the three members share 97% homology in their DNA-binding domains, 20–30% homology in their N-terminal transactivation domains, and 60–65% homology in their C-terminal ligand-binding domains based on compatible amino acid residue homology (8).

Members of the NR4A subgroup were categorized as NRs on the basis of structural homology to other members of the NR superfamily without prior identification of an endogenous ligand. Currently, no endogenous/native *bona fide* ligands have been identified, and thus members of this subgroup were designated as orphan NRs. These receptors are also constitutively active and operate in a ligand-independent manner (9). Structural studies on the ligand-binding domains (LBDs) of all three NR4A members have revealed that these receptors do not possess a ligand-binding cavity of conventional size due to the presence of bulky hydrophobic amino acid residue side chains

(10–13). However, several agonists have been recently described that may interact with these receptors in unconventional ways. Interestingly, these compounds can work either by modulating the N-terminal AF-1 [e.g. 6-mercaptopurine (11)] or the C-terminal LBD [e.g. 1,1-di(3'-indolyl)-1-(*p*-substituted phenyl)methanes (14)].

Concordant with the original cloning of these receptors from the central nervous system (or derived cell lines) (3–5), all three members have strong expression in this tissue (3, 4, 7, 15). The expression profiles of the NR4A subgroup in energy-dependent tissues such as skeletal muscle, brain, adipose tissues, heart, and liver (5, 7, 15–18) suggest a possible functional role in energy metabolism.

Members of the NR4A subgroup are known to bind to DNA as monomers, homodimers, and heterodimers. As monomers, the NR4A subgroup binds to the NGFI-B response element (NBRE; AAAGGTCA). This sequence consists of the canonical NR-binding motif (AGGTCA) preceded by two adenines (9, 19). As homodimers and heterodimers with other NR4A members, all three members of the NR4A subgroup bind to the Nur-responsive element, which consists of everted repeats of the sequence AAAT(G/A)(C/T)CA similar to the monomeric NBRE motif (20, 21). The prototypical and best characterized endogenous Nur-responsive element is found in the promoter of the proopiomelanocortin gene (20). Nur77 and Nurr1 (but not Nor-1) can also heterodimerize with retinoid X receptor (22, 23). NR4A/retinoid X receptor heterodimers bind to a combination of an NBRE and retinoic acid response element as direct repeats (22).

Functionally, the NR4A subgroup is involved in various hormonal, physiological, and pathophysiological processes including cardiovascular disease (24, 25), apoptosis (26, 27), neurological disease, steroidogenesis (28, 29), inflammation (30), oncogenesis (31, 32), and metabolic disease (33–35).

### The Expression of the NR4A Subgroup Is Induced by Diverse Stimuli

The expression of all three members of the NR4A subgroup are known to be rapidly and transiently induced by various diverse stimuli in a wide range of tissues and cultured cells. Briefly, such stimuli includes various receptor agonists [such as G protein-coupled receptors (28, 29, 36, 37) and tyrosine kinase receptors (38, 39)], activators of cAMP and protein kinase signaling (40–43), mechanical stress (44), exercise (45), and UV light (46). A much more comprehensive list of implicated stimuli is detailed in Table 1. Due to the acute induction of expression (typically 15–90 min after the stimuli), the members of NR4A subgroup have been classified as immediate-early re-

sponse genes (1, 47, 48). In many cases, stimuli that induce one member of the NR4A subgroup also induce the expression of the other two members in a similar spatio-temporal response (36, 37, 49). Because endogenous ligands have not been identified, the activity of the NR4A family may therefore be predominantly regulated by expression.

### $\beta$ -Adrenergic Signaling, cAMP, and Metabolism

Shortly after the discovery of Nur77, the expression of this receptor was found to be induced by  $\beta$ -adrenoceptor agonists (isoprenaline and norepinephrine) in cultured neural cells (50) and by conditions that cause norepinephrine release (stress and yohimbine treatment) in rat cerebral cortex (51).

$\beta$ -Adrenergic signaling regulates metabolic function, particularly in metabolically active peripheral tissues such as skeletal muscle and adipose (52–54). The importance of  $\beta$ -adrenergic signaling to metabolic homeostasis is highlighted by the unusual susceptibility of  $\beta$ -adrenoceptor knockout mice to diet-induced obesity (55). In skeletal muscle,  $\beta$ -adrenergic stimulation transiently induces the mRNA expression of all three NR4A members both *in vivo* (37, 49, 56, 57) and *in vitro* (16, 37, 57–59). This induction, which is typically 10- to 100-fold, has been observed with pan and subtype-specific  $\beta$ -adrenoceptor agonists (37, 49, 56, 57) and can be blocked by  $\beta$ -adrenoceptor antagonists (37). This induction has also been observed in both slow-twitch oxidative and fast-twitch glycolytic skeletal muscle (56, 57).

Providing further evidence of cross talk between the NR4A subgroup and  $\beta$ -adrenergic signaling in skeletal muscle is the demonstration that the expression of Nur77 is significantly decreased after skeletal muscle denervation, highlighting that sympathetic innervation is required for Nur77 expression (57). Exercise has also been noted as inducing all three members of the NR4A subgroup at 3 h (45). Because exercise enhances sympathetic tone (60), this also indirectly supports cross talk between the NR4A subgroup and  $\beta$ -adrenergic signaling.

Like many other systems in which the expression of NR4A subgroup is induced by diverse stimuli (61–64), the induction of the NR4A subgroup in skeletal muscle by  $\beta$ -adrenergic signaling appears mediated by cAMP, protein kinase A, MAPK, and finally cAMP response element-binding protein (56).

In other metabolically active tissues, NR4A mRNA expression has been transiently induced by  $\beta$ -adrenoceptor agonists in brown adipose tissue (BAT) (65, 66), white adipose tissue (WAT) (49, 66), liver, cardiac muscle, ad-

**TABLE 1.** Stimuli known to induce the NR4A family

| Type of stimuli                                          | Comments (with implicated receptor or enzyme where applicable)      | References                                         |             |
|----------------------------------------------------------|---------------------------------------------------------------------|----------------------------------------------------|-------------|
| Agonists of G protein-coupled receptors (GPCRs)          | $\beta$ -Adrenoceptors                                              | 16, 37, 50, 56–58, 66                              |             |
|                                                          | MSH receptors                                                       | 36                                                 |             |
|                                                          | ACTH receptor                                                       | 28, 40                                             |             |
|                                                          | Angiotensin receptors                                               | 29, 103, 104                                       |             |
|                                                          | Dopamine receptors                                                  | 105                                                |             |
|                                                          | Prostaglandin E2 receptor                                           | 106                                                |             |
|                                                          | $\alpha$ -Thrombin receptor                                         | 107, 108                                           |             |
|                                                          | LH/choriogonadotropin receptor                                      | 09, 110                                            |             |
|                                                          | FSH receptor                                                        | 111                                                |             |
|                                                          | Glucagon-like peptide 1 receptor                                    | 75                                                 |             |
|                                                          | Tyrosine kinase receptors (TKRs)                                    | Insulin receptor                                   | 39, 79–81   |
|                                                          |                                                                     | Vascular endothelial growth factor (VEGF) receptor | 38          |
|                                                          |                                                                     | Nerve growth factor receptor                       | 3, 41       |
|                                                          |                                                                     | Fibroblast growth factor receptors                 | 42, 47, 112 |
| Platelet-derived growth factor receptors                 |                                                                     | 47, 107                                            |             |
| Epidermal growth factor receptor                         |                                                                     | 107, 112                                           |             |
| Uncharacterized/complex mixtures of serum growth factors |                                                                     | 1, 6, 113, 114                                     |             |
| Agonists of cytokine receptors                           |                                                                     | Receptors activated by Interferon- $\gamma$        | 115         |
|                                                          |                                                                     | Receptors activated by IL-1                        | 116         |
|                                                          |                                                                     | Receptors activated by TNF- $\alpha$               | 115         |
| Agonists of toll-like receptors (TLRs)                   | TLR4 ligand (lipopolysaccharide)                                    | 80, 115, 117                                       |             |
|                                                          | TLR3 ligand (poly(I:C))                                             | 115, 118                                           |             |
|                                                          | TLR2 ligand (lipoteichoic acid)                                     | 115, 118                                           |             |
| Activators of cAMP and protein kinase signaling          | Adenylate cyclase activator (forskolin)                             | 40–43                                              |             |
|                                                          | Phosphodiesterase inhibitor (isobutylmethylxanthine)                | 79, 80                                             |             |
|                                                          | Protein kinase C activator [phorbol-12-myristate-13-acetate (PMA)]  | 40, 41, 112                                        |             |
|                                                          | Physical stress                                                     | Mechanical stress ( <i>in vitro</i> )              | 44          |
| Balloon angioplasty in coronary arteries                 |                                                                     | 107                                                |             |
| Exercise stress                                          | Aerobic and resistance exercise                                     | 45                                                 |             |
| Psychological stress                                     | In hypothalamus and cerebral cortex                                 | 51, 119                                            |             |
| Free fatty acids                                         | Unknown receptor/mechanism                                          | 76                                                 |             |
| Glucose                                                  | Unknown receptor/mechanism                                          | 75                                                 |             |
| Cholesterol                                              | Unknown receptor/mechanism                                          | 64                                                 |             |
| Low-density lipoproteins                                 | Low-density lipoprotein receptor                                    | 34                                                 |             |
| Thiazolidinediones                                       | Peroxisome proliferator-activated receptor $\gamma$ agonist         | 114, 120                                           |             |
| Membrane depolarization                                  | In excitable tissues                                                | 40, 105                                            |             |
| Neurotransmitters                                        | Dopamine receptors and $\gamma$ -aminobutyric acid (GABA) receptors | 121                                                |             |
| UV light                                                 | Expression in melanocytes                                           | 46                                                 |             |
| 50 Hz electromagnetic radiation                          | Unknown receptor/mechanism                                          | 57                                                 |             |
| Bisphenol A                                              | Endocrine-disrupting toxin                                          | 122                                                |             |

renal glands, kidney, stomach, and pancreas (49). These studies demonstrate that  $\beta$ -adrenergic signaling regulates the expression of the NR4A subgroup in multiple tissues. Given that  $\beta$ -adrenoceptors regulate metabolism, particularly in metabolically active peripheral tissues, the induction of NR4A expression in these tissues by  $\beta$ -adrenoceptors suggested an association between these receptors and metabolism.

### NR4A Subgroup and Metabolism in Skeletal Muscle

Given the known regulation of lipid, glucose, and energy metabolism in skeletal muscle by  $\beta$ -adrenergic signaling

(52, 53, 67, 68), the acute regulation of NR4A expression by  $\beta$ -adrenoceptor agonists in skeletal muscle implicated the NR4A subgroup as potential mediators of skeletal muscle metabolism after  $\beta$ -adrenergic signaling.

To examine the contribution of the NR4A subgroup to skeletal muscle metabolism *in vitro*, Maxwell *et al.* (58) used small interfering RNA (siRNA) to attenuate *Nur77* expression in C2C12 skeletal muscle cells. Consequently, this repression reduced lipolysis and altered the expression of genes (and proteins) associated with the regulation of lipid, carbohydrate, and energy metabolism (58). Of most interest, the expression of AMP-activated protein kinase subunit  $\gamma$  3 (*Ampk* $\gamma$ 3), fatty acid translocase (*Fat/Cd36*), and glucose transporter 4 (*Glut4* mRNA and pro-

tein) were repressed after the expression of Nur77 (but not negative control) siRNA, thus directly implicating *Nur77* expression in the regulation of key metabolic genes *in vitro* (see Table 2 for full list of regulated genes). This *in vitro* work was further validated by Chao *et al.* (57), who overexpressed *Nur77* within C2C12 cells via an adenoviral expression system. This resulted in the predominant induction of the expression of key genes associated with glucose transport, insulin signaling (such as *Glut4*), glycolysis, and glycogenolysis (see Table 2 for full list of regulated genes). Consistent with these gene expression changes, glucose transport was also enhanced by adenoviral *Nur77* expression, and Nur77 was shown to interact with the promoters of several identified genes *in vitro* (57). It should be noted that for most expression changes listed in Table 2, it has not been determined whether these are primary or secondary targets of NR4A manipulation.

Using a similar siRNA approach *in vitro*, *Nor-1* expression was repressed in C2C12 skeletal muscle cells (37, 56). Excitingly, biochemical examination of the *Nor-1* siRNA cells revealed significantly lower levels of palmitate (fatty acid) oxidation, and significantly greater lactate production, which is consistent with a shift from oxidative to anaerobic (glycolytic) energy production (56). Supporting dependence on anaerobic energy production, ATP levels in the *Nor-1* (but not negative control) siRNA-expressing cells were resistant to (azide-mediated) inhibition of oxidative metabolism (56). Also consistent with the shift to anaerobic metabolism was the induction of hypoxia-inducible factor-1 $\alpha$  (*Hif1\alpha*) mRNA expression, a key transcriptional regulator of anaerobic gene expression, and this is consistent with the shift to anaerobic metabolism. In terms of gene expression, *Nor-1* attenuation *in vitro* also altered the expression of genes associated with the regulation of lipid, carbohydrate, and energy metabolism (see Table 2 for full list of regulated genes). For example, this included mRNAs that encoded critical regulators of metabolism including *Lipin1*, *Foxo1*, and *Pgc1\alpha* (56). The mRNA expression of both subunits of pyruvate dehydrogenase phosphatase 1 (*Pdp1c* and *Pdp1r*) was also repressed, which is consistent with the shift to anaerobic metabolism via regulation of pyruvate dehydrogenase (56). Furthermore, attenuation of *Nor-1* expression *in vitro* dramatically induced the expression of myostatin (*Mstn*; >65-fold), a key negative regulator of skeletal muscle hypertrophy (37). Several of the genes identified by *Nor-1* knockdown *in vitro* were also up-regulated by  $\beta$ -adrenoceptor agonists *in vivo* in skeletal muscle (e.g. *Ucp2*, *Ucp3*, *Lipin1*, and *Pgc1\alpha*) (37, 56), therefore suggesting that *Nor-1* regulates acute gene expression associated with  $\beta$ -adrenergic signaling. Fur-

thermore, *in vitro*, *Nor-1* was recruited to the promoters of *Lipin1* and *Pdk4*, consistent with the direct transactivation of these genes by this receptor (56).

Interestingly, despite the conserved structural and sequence homology between Nur77 and *Nor-1*, and common hormone response elements, the expression of only one gene, caveolin 3 (*Cav3*), was repressed by suppression of both *Nur77* and *Nor-1* expression *in vitro* (37, 58). However, complementary genes and pathways were implicated in both the *Nor-1* and *Nur77* siRNA expression studies. For example, *Ucp2* expression was suppressed by *Nor-1* knockdown, whereas *Ucp3* expression was suppressed by *Nur77* attenuation (37, 58).

To date, only Nur77 has been manipulated *in vivo* in the context of skeletal muscle metabolism. *In vivo*, skeletal muscle *Nur77* expression has been manipulated by: 1) electroporation of *Nur77* expression vector in rats (57); 2) electroporation of *Nur77* small hairpin RNA expression vector in rats (57); 3) electroporation of *Nur77* siRNA expression vector in mice (58); 4) the utilization of the previously described (69) *Nur77* knockout mouse line (33, 57); and 5) finally the utilization of *Nur77* agonists (70). Consistent with the *in vitro* work on Nur77 in skeletal muscle (33, 57), many identical gene expression changes were identified *in vivo* (see Table 2 for full list of regulated genes). *In vivo*, Nur77 appears to regulate the expression of metabolic genes specifically involved in glucose transport, insulin signaling (such as *Glut4*), glycolysis, and glycogenolysis. Furthermore, *Ucp3* also appears regulated *in vivo* (58) (see Table 2 for full list of regulated genes).

Phenotypically, *Nur77* null mice exhibited limited metabolic changes on a normal diet; however, major changes are observed after high-fat feeding (33). The following changes related to skeletal muscle have been observed in *Nur77* null mice after high-fat feeding compared with wild-type animals: increased weight gain, decreased energy usage (by indirect calorimetry of oxygen), insulin resistance in skeletal muscle, and slower blood glucose clearance. In terms of glucose uptake and insulin signaling, the skeletal muscle of these mice exhibit decreased expression of *Glut4* and other genes related to glycolytic flux in skeletal muscle, impaired insulin receptor substrate 1 phosphorylation, increased lipid content (triacylglycerols and diacylglycerols), and lower glycolysis by-products. All these molecular and cellular events are consistent with impaired insulin signaling after loss of *Nur77* and with the gene expression changes observed both *in vivo* and *in vitro*. A note of caution with the *Nur77* null mice is the dramatic compensatory increase in *Nor-1* expression that has been observed in these animals



**TABLE 2.** Metabolically associated gene and/or protein expression altered by manipulation of NR4A members (direct or indirect targets)

| Gene                                                        | Full name                                                                   | Site of observation and reference(s)                               |
|-------------------------------------------------------------|-----------------------------------------------------------------------------|--------------------------------------------------------------------|
| Regulated by alterations to <i>Nur77</i> (NR4A1) expression |                                                                             |                                                                    |
| <i>AbcG5</i>                                                | ATP-binding cassette subfamily G member 5                                   | Liver (74)                                                         |
| <i>AbcG8</i>                                                | ATP-binding cassette subfamily G member 8                                   | Liver (74)                                                         |
| <i>AdipoR2</i>                                              | Adiponectin receptor 2                                                      | C2C12 myotubes (33, 57)                                            |
| <i>Aldo1</i>                                                | Aldolase 1                                                                  | Skeletal muscle (57)                                               |
| <i>Aldo2</i>                                                | Aldolase 2                                                                  | Skeletal muscle (58)                                               |
| <i>Ampk<math>\gamma</math>3</i>                             | AMP-activated protein kinase subunit $\gamma$ 3                             | C2C12 myotubes (57)                                                |
| <i>ApoB</i>                                                 | Apolipoprotein B                                                            | Liver (74)                                                         |
| <i>ApoE</i>                                                 | Apolipoprotein E                                                            | Liver (74)                                                         |
| <i>Atf3</i>                                                 | Activating transcription factor 3                                           | Skeletal muscle and C2C12 myotubes (58)                            |
| <i>Bpgm</i>                                                 | 2,3-Bisphosphoglycerate mutase                                              | Skeletal muscle and C2C12 myotubes (58)                            |
| <i>Cav3</i>                                                 | Caveolin 3                                                                  | C2C12 myotubes (33)                                                |
| <i>Ehhadh</i>                                               | enoyl-coenzyme A, hydratase/3-hydroxyacyl coenzyme A dehydrogenase          | Skeletal muscle (33, 57)                                           |
| <i>Eno3</i>                                                 | Enolase 3                                                                   | Skeletal muscle, C2C12 myotubes (58) and liver (73, 74)            |
| <i>Fat</i>                                                  | Fatty acid translocase                                                      | C2C12 myotubes (33)                                                |
| <i>Fas</i>                                                  | Fatty acid synthase                                                         | Liver (57, 74)                                                     |
| <i>Fbp1</i>                                                 | Fructose-1,6-bisphosphatase 1                                               | Liver (73)                                                         |
| <i>Fbp2</i>                                                 | Fructose-1,6-bisphosphatase 2                                               | Skeletal muscle and C2C12 myotubes (33, 57, 58) and liver (73, 74) |
| <i>Fxr</i>                                                  | Farnesoid X receptor                                                        | Liver (74)                                                         |
| <i>G6pc</i>                                                 | Glucose-6-phosphatase                                                       | Liver (73)                                                         |
| <i>Glut4</i>                                                | Glucose transporter 4                                                       | Skeletal muscle and C2C12 myotubes (57)                            |
| <i>Gpd1</i>                                                 | Glycerol-3-phosphate dehydrogenase                                          | Skeletal muscle and C2C12 myotubes (57)                            |
| <i>Gys3</i>                                                 | Glycogen synthase 3                                                         | C2C12 myotubes (33)                                                |
| <i>Ldlr</i>                                                 | LDL receptor                                                                | Liver (74)                                                         |
| <i>Lipc</i>                                                 | Hepatic lipase                                                              | Liver (74)                                                         |
| <i>Lpn1</i>                                                 | Lipin1                                                                      | Skeletal muscle (33, 57)                                           |
| <i>Lpl</i>                                                  | Lipoprotein lipase                                                          | Skeletal muscle (33)                                               |
| <i>Pdk4</i>                                                 | Pyruvate dehydrogenase kinase, isozyme 4                                    | Skeletal muscle (57)                                               |
| <i>Pfkfb</i>                                                | Phosphofructokinase, muscle                                                 | Skeletal muscle and C2C12 myotubes (57)                            |
| <i>Pgam2</i>                                                | Phosphoglycerate mutase 2 (muscle)                                          | Skeletal muscle and C2C12 myotubes (33, 57)                        |
| <i>Pgk1</i>                                                 | Phosphoglycerate kinase 1                                                   | Skeletal muscle and C2C12 myotubes (57)                            |
| <i>Phka1</i>                                                | Phosphorylase kinase, $\alpha$ 1                                            | Skeletal muscle and C2C12 myotubes (57)                            |
| <i>Phkg1</i>                                                | Phosphorylase kinase, $\gamma$ 1                                            | Skeletal muscle and C2C12 myotubes (57)                            |
| <i>Ppp1r3c</i>                                              | Protein phosphatase 1 regulatory subunit 3C                                 | Skeletal muscle and C2C12 myotubes (57)                            |
| <i>Pygm</i>                                                 | Phosphorylase, glycogen, muscle                                             | Skeletal muscle and C2C12 myotubes (33)                            |
| <i>Rxr<math>\alpha</math></i>                               | Retinoid X receptor $\alpha$                                                | Liver (74)                                                         |
| <i>Scd1</i>                                                 | Stearoyl-coenzyme A desaturase 1                                            | Liver (57, 74)                                                     |
| <i>Slc37a2</i>                                              | Solute carrier family 37, member 2 (glycerol-3-phosphate transporter)       | C2C12 myotubes (33)                                                |
| <i>Srebp1c</i>                                              | Sterol regulatory-element-binding protein-1c                                | C2C12 myotubes (57, 58) and liver (74)                             |
| <i>Ucp2</i>                                                 | Uncoupling protein 2                                                        | C2C12 myotubes (57, 58)                                            |
| <i>Ucp3</i>                                                 | Uncoupling protein 3                                                        | Skeletal muscle and C2C12 myotubes (37)                            |
| Regulated by alterations to <i>Nor-1</i> (NR4A3) expression |                                                                             |                                                                    |
| <i>Cav3</i>                                                 | Caveolin 3                                                                  | C2C12 myotubes (37)                                                |
| <i>Eno3</i>                                                 | Enolase 3                                                                   | Liver (73)                                                         |
| <i>Fabp4</i>                                                | Fatty acid binding protein 4                                                | C2C12 myotubes (56)                                                |
| <i>Fbp1</i>                                                 | Fructose-1,6-bisphosphatase 1                                               | Liver (73)                                                         |
| <i>Fbp2</i>                                                 | Fructose-1,6-bisphosphatase 2                                               | Liver (73)                                                         |
| <i>Hif1<math>\alpha</math></i>                              | Hypoxia inducible factor-1 $\alpha$                                         | C2C12 myotubes (56)                                                |
| <i>G6pc</i>                                                 | Glucose-6-phosphatase                                                       | Liver (73)                                                         |
| <i>Mstn</i>                                                 | Myostatin                                                                   | C2C12 myotubes (56)                                                |
| <i>Pdp1c</i>                                                | Pyruvate dehydrogenase phosphatase isoform 1 catalytic subunit              | C2C12 myotubes (56)                                                |
| <i>Pdp1r</i>                                                | Pyruvate dehydrogenase phosphatase isoform 1 regulatory subunit             | C2C12 myotubes (56)                                                |
| <i>Pgc1<math>\alpha</math></i>                              | Peroxisome proliferator-activated receptor- $\gamma$ coactivator 1 $\alpha$ | C2C12 myotubes (56)                                                |

(Continued)

TABLE 2. Continued

| Gene                          | Full name                                                                  | Site of observation and reference(s) |
|-------------------------------|----------------------------------------------------------------------------|--------------------------------------|
| <i>Pgc1<math>\beta</math></i> | Peroxisome proliferator-activated receptor- $\gamma$ coactivator 1 $\beta$ | C2C12 myotubes (66)                  |
| <i>Ucp1</i>                   | Uncoupling protein 1                                                       | 3T3-L1 cells (37)                    |
| <i>Ucp2</i>                   | Uncoupling protein 2                                                       | C2C12 myotubes (37)                  |
| <i>Ucp3</i>                   | Uncoupling protein 3                                                       | C2C12 myotubes (10, 11, 13, 91)      |

(29, 65), potentially masking aspects of the phenotype that could be rescued by enhanced *Nor-1* expression.

Indirect evidence that NR4A expression is associated with skeletal muscle metabolism has also been published. In a recent study of rats selectively bred for low or high endurance capacity, comparisons revealed significantly lower mRNA/protein expression of *Nur77*- and *Nur77*-regulated genes (e.g. *Cd36*, *Ucp3*, and *Ampk $\gamma$ 3*) within the low endurance capacity cohort (71). This is in concordance with the study from Maxwell *et al.* (58). Furthermore,  $\beta$ -adrenoceptor agonist-induced lipolysis and hormone sensitive lipase phosphorylation were both attenuated in the low-endurance capacity cohort (71). In other studies, skeletal muscle *Nur77* expression was found to be repressed in rats after a high-fat diet, and all three NR4A members were repressed in rodent models of obesity and diabetes (34, 59). Conversely, *Nur77* was induced by exercise (59), and all three NR4A members are induced by dietary restriction (72). These studies indicate that *Nur77* expression is strongly associated with metabolic activity.

### NR4A Subgroup and Metabolism in the Liver and Pancreas

Similar to the emerging role of the NR4A subgroup in skeletal muscle metabolism, the NR4A subgroup has been associated with glucose homeostasis in the liver. Pei *et al.* (73) demonstrated *in vivo* that the NR4A subgroup is induced by glucagon and fasting, and that all three members of the NR4A subgroup induce hepatocyte glucose production *in vitro*. The ecotopic adenoviral expression of *Nur77* stimulated glucose production both *in vitro* and *in vivo*, raised blood glucose levels *in vivo*, and induced genes involved in gluconeogenesis (see Table 2 for full list of regulated genes) (73). Conversely, expression of an inhibitory mutant *Nur77* receptor reduced hepatic glucose production and lowered blood glucose levels *in vivo* (73). Consistent with these studies, *Nur77* null mice on a high-fat diet also exhibit decreased hepatic glucose production and liver insulin resistance (33), whereas treatment with the *Nur77* agonist, cytosporone B, was observed to increase blood glucose levels in fasting mice

(70). Interestingly, Pei *et al.* (73) also demonstrated that hepatic expression of *Nur77*, *Nurr1*, and *Nor-1* is induced by the cAMP axis in response to glucagon in a very similar fashion to  $\beta$ -adrenoceptor signaling in skeletal muscle.

In terms of liver lipid metabolism, hepatic expression of *Nur77* via adenoviral overexpression vectors in mice modulated the plasma lipid profile, reduced hepatic triglyceride content, and reduced expression of *Srebp1c*, a master regulator of lipid and cholesterol metabolism (74). Consequently, downstream lipogenic target genes of *Srebp1c* were also reduced (see Table 2 for full list of regulated genes) (74). Conversely, *Nur77* null mice on a high-fat diet exhibit increased hepatic steatosis and enhanced expression of lipogenic genes in liver (33).

Further evidence for the role of the NR4A subgroup in liver, is that ip injection of  $\beta$ -adrenoceptor agonists significantly induces the NR4A subgroup in liver (49). Moreover, various metabolic genes were regulated by  $\beta$ -adrenoceptor signaling in liver, including genes previously associated with the NR4A receptors (*Fabp4* and *Lipin1*) in skeletal muscle (49). All three NR4A members are also induced in liver after dietary restriction, highlighting the association of the NR4A subgroup with dietary input in this key metabolic tissue (72).

The role of the NR4A subgroup in the context of pancreatic insulin function has not yet been examined; however, *Nur77* expression is induced by glucose and palmitate in a pancreatic  $\beta$ -cell line *in vitro* (75, 76), and polymorphisms at the *Nor-1* locus have been associated with pancreatic insulin function (35).

### NR4A Subgroup and Metabolism in Adipose Tissue

The NR4A subgroup has been associated with metabolism in both WAT and BAT. BAT is a well-characterized thermogenic tissue in mammals. Functionally, in BAT thermogenesis is mediated by  $\beta$ -adrenoceptor signaling induced by cold exposure, which in turn activates hormone sensitive lipase activity and uncoupling protein 1 (*Ucp1*) activity and expression (77). In BAT and cultured brown adipocytes (human and mouse), members of the

NR4A subgroup (mRNA and protein) were found to be induced by  $\beta$ -adrenoceptor agonists and cold exposure (65, 66), therefore implicating the NR4A subgroup in nonshivering thermogenesis. Nur77-deficient mice were examined in the context of nonshivering thermogenesis and shown to exhibit normal regulation of this process; however, they did exhibit a superinduction of *Nor-1* expression in BAT, possibly compensating for the loss of Nur77 (65). Supporting the thermogenesis hypothesis, a dominant-negative mutant Nur77 receptor that prevents the transcriptional activity of all NR4A receptors blocked  $\beta$ -adrenoceptor receptor-stimulated *Ucp1* gene transcription *in vitro* (66). Using gel shift, chromatin immunoprecipitation, and luciferase-reporter assay promoter analysis, *Ucp1* appears to be a direct target of Nor-1 in BAT (66).

In WAT, the NR4A subgroup has been associated with glucose metabolism and adipogenesis *in vitro*. First, in terms of insulin and glucose homeostasis in WAT, insulin and the insulin sensitizers thiazolidinediones were shown to induce both Nur77 and *Nor-1* in 3T3-L1 adipocytes (34). Viral overexpression of *Nor-1* in 3T3-L1 cells increased insulin-stimulated glucose uptake, enhanced protein phosphorylation associated with insulin-stimulated glucose uptake (IRS, AKT), and translocated Glut4 protein to the plasma membrane, whereas conversely, viral *Nor-1* siRNA expression did the opposite (34). Supporting this association, WAT expression of Nur77 and *Nor-1* was also down-regulated in mouse models of obesity and diabetes (34).

Second, the NR4A subgroup is induced during adipogenesis (78). Two studies have implicated the NR4A subgroup as regulators of adipogenesis (79, 80), whereas conversely, one study suggested the NR4A subgroup had no involvement (81). Using *in vitro* models of adipogenesis, it has been demonstrated that mRNA and protein expression for all three members of the NR4A subgroup are highly induced during adipogenesis (79–81). This suggested that the NR4A subgroup could be involved in adipogenesis; however, the NR4A subgroup could also be induced during differentiation for reasons independent of adipogenesis.

To determine whether the induction of the NR4A subgroup is required for adipogenesis, Fumoto *et al.* (79) overexpressed and repressed Nur77 expression in 3T3-L1 fibroblasts. Both chronic overexpression and chronic repression of Nur77 inhibited adipogenesis (79). Interestingly, whereas chronic overexpression of Nur77 inhibited adipogenesis, transient overexpression promoted adipogenesis, thus suggesting that only transient induction of Nur77 may be required for adipogenesis (79). Supporting this study, Chao *et al.* (80) demonstrated that viral trans-

duction of NR4A receptors into preadipocytes inhibits adipogenesis in both 3T3-L1 or 3T3-F442A preadipocytes. NR4A-mediated inhibition of adipogenesis was also not able to be rescued by Pparg activation (80), a key activator of adipogenesis (82). Opposing these two adipogenesis studies, siRNA suppression of Nur77 expression during adipogenesis in 3T3-L1 fibroblasts appeared to have no effect on adipogenesis, the induction of adipogenic genes, or lipid accumulation (81). Furthermore, use of a retroviral dominant-negative Nur77 (known to also block the function of Nur1 and Nor-1) prevented the increased NR4A expression observed during adipogenesis in 3T3-L1 fibroblasts (81). However, this did not affect the expression of genes required for adipocyte differentiation or adipogenesis (81).

Like skeletal muscle, liver, and BAT, WAT is also a target of  $\beta$ -adrenoceptor signaling, with  $\beta$ -adrenoceptor signaling resulting in lipolysis and fatty acid mobilization from this tissue [reviewed in Lafontan and Berlan (83)]. All three NR4A receptors appear transiently induced by the  $\beta$ -adrenoceptor agonist, isoprenaline, in epididymal WAT *in vivo*; however, interestingly, no NR4A induction was observed in inguinal, visceral, or sc fat depots (49). The reason for this differential NR4A induction between fat depots is unclear at this point. Furthermore, acute systemic administration of the  $\beta$ -adrenoceptor agonist initiated widespread changes to metabolic gene expression within epididymal WAT (49). It is likely that the NR4A subgroup may mediate some of these expression changes.

## NR4A Subgroup and Satiety

In two mouse models of obesity, hypothalamic *Nor-1* expression was significantly decreased compared with wild-type mice (84). Because the hypothalamus controls appetite, *Nor-1* expression was attenuated in the hypothalamus via local injection of *Nor-1* siRNA oligonucleotide in mice (84). Compared with the control siRNA injection, *Nor-1* siRNA suppressed food intake and reduced body weight in mice, suggesting that hypothalamic *Nor-1* expression induces feeding behavior and energy accumulation (84). However, because this study used siRNA oligonucleotides, the possibility of nonspecific gene suppression exists. Furthermore, because the expression of the NR4A subgroup is associated with energy usage outside of the hypothalamus (33, 66), it seems paradoxical that the opposing effect of energy accumulation would specifically occur due to hypothalamic expression.

Interestingly, a recent study has demonstrated that  $\alpha$ -MSH induces the NR4A subgroup in melanocytes in a melanocortin 1 receptor-dependent manner (36). Given

the role of  $\alpha$ -MSH in the regulation of satiety at the hypothalamus (reviewed in Ref. 85) and the apparent peripheral metabolic actions of  $\alpha$ -MSH (86), the unexplored possibility exists that regulation of satiety by  $\alpha$ -MSH in the hypothalamus and metabolic function in peripheral tissues involve NR4A signaling.

## NR4As and Human Disease

In the context of human disease, the NR4A subgroup is induced by: 1) atherogenic stimuli; 2) expressed in atherosclerotic plaques, and lesions; and 3) activated in smooth muscle cells (SMCs) by vascular disease (reviewed in Refs. 87 and 88). Exogenous NR4A expression reduces inflammatory cytokine and scavenger receptor expression (that diminishes low-density lipoprotein accumulation) in macrophages (89). In concordance, siRNA-mediated NR4A loss of function raises low-density lipoprotein absorption and inflammatory cytokine expression (89). Moreover, overexpression of the NR4A subgroup in SMCs attenuates proliferation (and mediates differentiation); concordantly, dominant negative expression of Nur77 augments proliferation (90). Nur77 gain- and loss-of-function mice display reduced arterial lesions and larger lesions, respectively (90). Furthermore, the agonist 6-mercaptopurine attenuated SMC proliferation and lesion formation in mice (25), underscoring the pathophysiological role of these NRs in atherogenic responses.

Recently, population screening was used to examine single-nucleotide polymorphisms within the human Nor-1 locus in the context of insulin function (35). Within the Nor-1 locus, five common single-nucleotide polymorphisms were associated with the control of pancreatic insulin secretion in a population study group of 1495 patients. However, as this population study only examined known common single-nucleotide polymorphisms, less common mutations (which could potentially be more detrimental) may have been missed.

## NR4A Agonists

As discussed earlier, currently, no endogenous/native *bona fide* ligands have been identified for the members of the NR4A subgroup (*i.e.* compounds that have specific interactions with the NR ligand-binding cavity and bind the receptors under physiological conditions and concentrations). The NR4A subgroup lacks traditional NR ligand-binding cavities (11–13, 91); however, several synthetic and natural compounds have been identified as agonists (the chemical structures are shown in Fig. 1). It is worth discussing the natural, pharmaceutical, and syn-

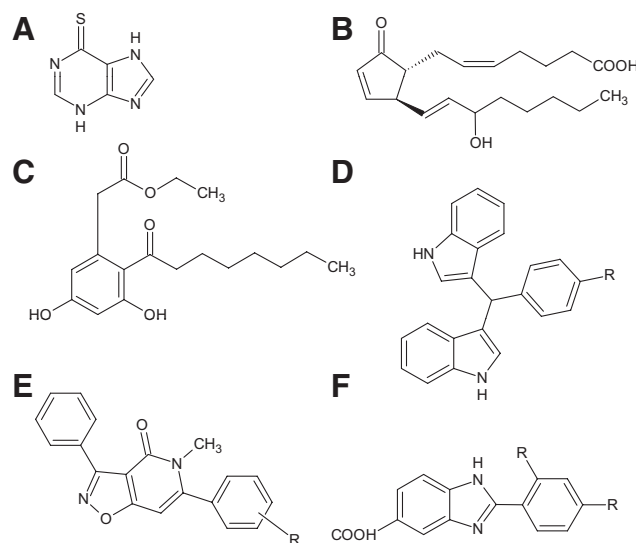

**FIG. 1.** Skeletal formula of the NR4A agonists. The published compounds that modulate the activity of the NR4 subgroup are: (A) 6-mercaptopurine, (B) prostaglandin A<sub>2</sub>, (C) cytosporone B, (D) 1,1-di(3'-indolyl)-1-(*p*-substituted phenyl)methane derivatives, (E) isoxazolopyridinone derivatives, and (F) benzimidazole derivatives.

thetic compounds that have been reported to modulate the activity of the NR4A subgroup. These compounds serve as pharmacological probes of NR function, allow the identification of new signaling pathways, and complement the genetic gain- and loss-of-function studies. In addition, they provide insights into the potential therapeutic utility of targeting these NRs in human disease.

The first NR4A agonist identified was the thiopurine antimetabolite, 6-mercaptopurine, which was identified from high-throughput screening as an agonist of all three NR4A members (11, 92, 93). Furthermore, several related thiopurine compounds were also demonstrated to activate Nor-1 (11). Unlike known ligands for classical NRs that bind and mediate activity via the receptor LBD, deletion studies have shown that activation of Nur1 and Nor-1 by 6-mercaptopurine involves the modulation of activation function-1 (AF-1) located within the amino-terminal-regulatory (A/B) domain and that this activation is independent of the LBD (11, 92). Furthermore, 6-mercaptopurine was also shown to modulate the activity of the NR4A coactivator TRAP220 (93). Consistent with the role of Nur77 in vascular maintenance (24, 90), local administration of 6-mercaptopurine to arteries protects against excessive vascular SMC proliferation and vascular lesion formation (25).

A number of compounds based on 1,1-di(3'-indolyl)-1-(*p*-substituted phenyl)methanes have also been discovered to be agonists of Nur77 (14, 94). These compounds are derivatives of diindolylmethane, an investigative anticarcinogen compound found in *Brassica* vegetables such as broccoli and cauliflower (14, 94). Through deletion



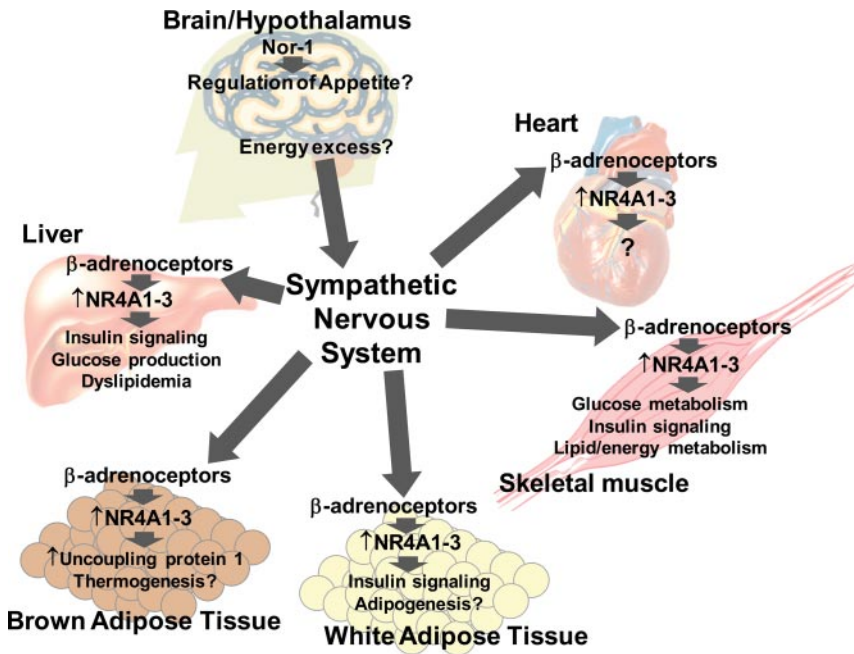

**FIG. 2.** Summary of the studies describing tissue specific NR4A activity in the context of metabolism.

studies, 1,1-di(3'-indolyl)-1-(*p*-substituted phenyl)methanes were shown to be dependent on the Nur77 LBD for activity, suggesting that these compounds interact with the LBD or interact with a secondary molecule that binds the LBD (14, 94). However, it is not clear whether they bind the ligand-binding cavity directly. To date 1,1-di(3'-indolyl)-1-(*p*-substituted phenyl)methanes have been shown to induce proapoptotic pathways in cancer cells both *in vitro* and *in vivo*, and this appears to be mediated via Nur77 (94). This is consistent with the known proapoptotic effects of Nur77 (26, 95). These compounds also appear to be well tolerated in mice without apparent side effects (94). One drawback of these compounds is that the 1,1-di(3'-indolyl)-1-(*p*-substituted phenyl)methanes display poor selectivity. For example, these compounds also activate the NR Ppar $\gamma$  (96).

Prostaglandin A2 was identified from libraries of bioactive lipid-soluble compounds as a transactivator of Nor-1 (97). Deletion studies revealed that transactivation by prostaglandin A2 was dependent on the Nor-1 LBD for activity. Furthermore, Kagaya *et al.* (97) demonstrated dose-dependent direct binding of prostaglandin A2 to the Nor-1-LBD contained within a glutathione-S-transferase-Nor-1-LBD fusion protein using a Biacore system. However, this study did not indicate a specific interaction of prostaglandin A2 to the Nor-1 ligand-binding cavity. Although prostaglandin A2 is an endogenous compound, Nor-1 is not presumed to be the endogenous receptor for this compound because interactions between Nor-1 and prostaglandin A2 *in vitro* appear to be at su-

perphysiological concentrations, display poor potency, and poorly activate Nor-1 (97).

Two publications have described synthetic compounds that bind and activate Nurr1. The first paper by Dubois *et al.* (98) describes a series of compounds based on a benzimidazole scaffold that were discovered by virtual screening methods *in silico*. These compounds were subsequently tested *in vitro* and were shown to be very potent agonists of Nurr1 with binding curve EC<sub>50</sub> values of up to 8 nM. The second paper, by Hintermann *et al.* (99), described a series of isoxazopyridinone compounds that are even more potent, with EC<sub>50</sub> values of up to 0.8 nM for Nurr1 *in vitro*. Of interest, these isoxazopyridinone compounds have high oral bioavailability and can penetrate the blood-brain barrier. Consequently, given the role of Nurr1 in dopamine homeostasis (100–102), these compounds may have therapeutic utility against Parkinson's disease (99).

However, interestingly, no *in vivo* experiments have been published with these compounds.

Recently, the octaketide cytosporone B from *Dothiorella* sp. HTF3, a mangrove endophytic fungus, has been identified as an agonist of Nur77 (70). Through the use of fluorescence quenching on Nur77 truncation mutants, cytosporone B was shown to directly bind to the LBD (70). Like the other known NR4A agonists, this study did not indicate a specific interaction to the Nur77 ligand-binding cavity. Cytosporone B was well tolerated in mice and was noted to increase blood glucose levels in fasting mice (70). Furthermore, cytosporone B was also shown to induce apoptosis in cancer cells *in vitro* and inhibit the growth of xenograph tumors *in vivo*.

In summary, *bona fide* endogenous ligands for the NR4A subgroup have not been identified to date; however, several small molecule agonists have been identified. The preliminary studies reviewed suggest that pharmacological manipulation and exploitation of NR4A activity may have therapeutic utility against dyslipidemia, obesity, diabetes, and cardiovascular disease.

## Conclusions

Over the past 5 yr, the NR4A subgroup has been implicated in the regulation of lipid/carbohydrate/energy homeostasis in the key metabolic tissues of skeletal muscle,

liver, WAT, and BAT. Because the NR4A subgroup is induced by  $\beta$ -adrenergic signaling in these key tissues, the possibility exists that the NR4A subgroup transcriptionally regulates metabolic function and gene expression in response to  $\beta$ -adrenergic signaling. The importance of  $\beta$ -adrenergic signaling to metabolic homeostasis is highlighted by the increased susceptibility of  $\beta$ -adrenoceptor knockout mice to diet-induced obesity (55). Figure 2 provides a current general summary of tissue-specific involvement of the NR4A subgroup in the metabolic function of various tissues in relation to  $\beta$ -adrenergic signaling.

Whereas future studies should clarify the exact role these receptors play in metabolism, the current data are suggestive that modulation of these receptors could produce useful therapeutic outcomes in the context of metabolic disease, obesity, dyslipidemia, and cardiovascular disease.

## Acknowledgments

Address all correspondence and requests for reprints to: George Muscat or Michael Pearen, Institute for Molecular Bioscience, The University of Queensland, Queensland 4072, Australia. E-mail: g.muscat@uq.edu.au or m.pearen@uq.edu.au.

This work was supported by a National Health and Medical Research Council of Australia project grant. G.E.O.M. is a Principal Research Fellow of the National Health and Medical Research Council of Australia.

Disclosure Summary: The authors of this manuscript have nothing to disclose.

## References

- Lau LF, Nathans D 1985 Identification of a set of genes expressed during the G0/G1 transition of cultured mouse cells. *EMBO J* 4:3145–3151
- Hazel TG, Nathans D, Lau LF 1988 A gene inducible by serum growth factors encodes a member of the steroid and thyroid hormone receptor superfamily. *Proc Natl Acad Sci USA* 85:8444–8448
- Milbrandt J 1988 Nerve growth factor induces a gene homologous to the glucocorticoid receptor gene. *Neuron* 1:183–188
- Law SW, Conneely OM, DeMayo FJ, O'Malley BW 1992 Identification of a new brain-specific transcription factor, NURR1. *Mol Endocrinol* 6:2129–2135
- Ohkura N, Hijikuro M, Yamamoto A, Miki K 1994 Molecular cloning of a novel thyroid/steroid receptor superfamily gene from cultured rat neuronal cells. *Biochem Biophys Res Commun* 205:1959–1965
- Hedvat CV, Irving SG 1995 The isolation and characterization of MINOR, a novel mitogen-inducible nuclear orphan receptor. *Mol Endocrinol* 9:1692–1700
- Ohkura N, Ito M, Tsukada T, Sasaki K, Yamaguchi K, Miki K 1996 Structure, mapping and expression of a human NOR-1 gene, the third member of the Nur77/NGFI-B family. *Biochim Biophys Acta* 1308:205–214
- Maruyama K, Tsukada T, Ohkura N, Bandoh S, Hosono T, Yamaguchi K 1998 The NGFI-B subfamily of the nuclear receptor superfamily (review). *Int J Oncol* 12:1237–1243
- Wilson TE, Fahrner TJ, Johnston M, Milbrandt J 1991 Identification of the DNA binding site for NGFI-B by genetic selection in yeast. *Science* 252:1296–1300
- Wansa KD, Harris JM, Muscat GE 2002 The activation function-1 domain of Nur77/NR4A1 mediates trans-activation, cell specificity, and coactivator recruitment. *J Biol Chem* 277:33001–33011
- Wansa KD, Harris JM, Yan G, Ordentlich P, Muscat GE 2003 The AF-1 domain of the orphan nuclear receptor NOR-1 mediates trans-activation, coactivator recruitment, and activation by the purine anti-metabolite 6-mercaptopurine. *J Biol Chem* 278:24776–24790
- Wang Z, Benoit G, Liu J, Prasad S, Aarnisalo P, Liu X, Xu H, Walker NP, Perlmann T 2003 Structure and function of Nurr1 identifies a class of ligand-independent nuclear receptors. *Nature* 423:555–560
- Flaig R, Greschik H, Peluso-Iltis C, Moras D 2005 Structural basis for the cell-specific activities of the NGFI-B and the Nurr1 ligand-binding domain. *J Biol Chem* 280:19250–19258
- Chintharlapalli S, Burghardt R, Papineni S, Ramaiah S, Yoon K, Safe S 2005 Activation of Nur77 by selected 1,1-bis(3'-indolyl)-1-(p-substituted phenyl)methanes induces apoptosis through nuclear pathways. *J Biol Chem* 280:24903–24914
- Bookout AL, Jeong Y, Downes M, Yu RT, Evans RM, Mangelsdorf DJ 2006 Anatomical profiling of nuclear receptor expression reveals a hierarchical transcriptional network. *Cell* 126:789–799
- Lim RW, Yang WL, Yu H 1995 Signal-transduction-pathway-specific desensitization of expression of orphan nuclear receptor TIS1. *Biochem J* 308:785–789
- Ohkura N, Ito M, Tsukada T, Sasaki K, Yamaguchi K, Miki K 1998 Alternative splicing generates isoforms of human neuron-derived orphan receptor-1 (NOR-1) mRNA. *Gene* 211:79–85
- Maltais A, Labelle Y 2000 Structure and expression of the mouse gene encoding the orphan nuclear receptor TEC. *DNA Cell Biol* 19:121–130
- Wilson TE, Fahrner TJ, Milbrandt J 1993 The orphan receptors NGFI-B and steroidogenic factor 1 establish monomer binding as a third paradigm of nuclear receptor-DNA interaction. *Mol Cell Biol* 13:5794–5804
- Philips A, Lesage S, Gingras R, Maira MH, Gauthier Y, Hugo P, Drouin J 1997 Novel dimeric Nur77 signaling mechanism in endocrine and lymphoid cells. *Mol Cell Biol* 17:5946–5951
- Maira M, Martens C, Philips A, Drouin J 1999 Heterodimerization between members of the Nur subfamily of orphan nuclear receptors as a novel mechanism for gene activation. *Mol Cell Biol* 19:7549–7557
- Perlmann T, Jansson L 1995 A novel pathway for vitamin A signaling mediated by RXR heterodimerization with NGFI-B and NURR1. *Genes Dev* 9:769–782
- Zetterström RH, Solomin L, Mitsiadis T, Olson L, Perlmann T 1996 Retinoid X receptor heterodimerization and developmental expression distinguish the orphan nuclear receptors NGFI-B, Nurr1, and Nor1. *Mol Endocrinol* 10:1656–1666
- Arkenbout EK, van Bragt M, Eldering E, van Bree C, Grimbergen JM, Quax PH, Pannekoek H, de Vries CJ 2003 TR3 orphan receptor is expressed in vascular endothelial cells and mediates cell cycle arrest. *Arterioscler Thromb Vasc Biol* 23:1535–1540
- Pires NM, Pols TW, de Vries MR, van Tiel CM, Bonta PI, Vos M, Arkenbout EK, Pannekoek H, Jukema JW, Quax PH, de Vries CJ 2007 Activation of nuclear receptor Nur77 by 6-mercaptopurine protects against neointima formation. *Circulation* 115:493–500
- Woronicz JD, Calnan B, Ngo V, Winoto A 1994 Requirement for the orphan steroid receptor Nur77 in apoptosis of T-cell hybridomas. *Nature* 367:277–281
- Calnan BJ, Szychowski S, Chan FK, Cado D, Winoto A 1995 A

- role for the orphan steroid receptor Nur77 in apoptosis accompanying antigen-induced negative selection. *Immunity* 3:273–282
28. Wilson TE, Mouw AR, Weaver CA, Milbrandt J, Parker KL 1993 The orphan nuclear receptor NGFI-B regulates expression of the gene encoding steroid 21-hydroxylase. *Mol Cell Biol* 13:861–868
  29. Fernandez PM, Brunel F, Jimenez MA, Saez JM, Cereghini S, Zakin MM 2000 Nuclear receptors Nor1 and NGFI-B/Nur77 play similar, albeit distinct, roles in the hypothalamo-pituitary-adrenal axis. *Endocrinology* 141:2392–2400
  30. Murphy EP, McEvoy A, Connely OM, Bresnihan B, FitzGerald O 2001 Involvement of the nuclear orphan receptor NURR1 in the regulation of corticotropin-releasing hormone expression and actions in human inflammatory arthritis. *Arthritis Rheum* 44:782–793
  31. Labelle Y, Zucman J, Stenman G, Kindblom LG, Knight J, Turc-Carel C, Dockhorn-Dworniczak B, Mandahl N, Desmaze C, Peter M 1995 Oncogenic conversion of a novel orphan nuclear receptor by chromosome translocation. *Hum Mol Genet* 4:2219–2226
  32. Clark J, Benjamin H, Gill S, Sidhar S, Goodwin G, Crew J, Gusteron BA, Shipley J, Cooper CS 1996 Fusion of the EWS gene to CHN, a member of the steroid/thyroid receptor gene superfamily, in a human myxoid chondrosarcoma. *Oncogene* 12:229–235
  33. Chao LC, Wroblewski K, Zhang Z, Pei L, Vergnes L, Ilkayeva OR, Ding S, Reue K, Watt MJ, Newgard CB, Pilch PF, Hevener AL, Tontonoz P 2009 Insulin resistance and altered systemic glucose metabolism in mice lacking Nur77. *Diabetes* 58:2788–2796
  34. Fu Y, Luo L, Luo N, Zhu X, Garvey WT 2007 NR4A orphan nuclear receptors modulate insulin action and the glucose transport system: Potential role in insulin resistance. *J Biol Chem* 282:31525–31533
  35. Weyrich P, Staiger H, Stancáková A, Schäfer SA, Kirchhoff K, Ullrich S, Ranta F, Gallwitz B, Stefan N, Machicao F, Kuusisto J, Laakso M, Fritsche A, Häring HU 2009 Common polymorphisms within the NR4A3 locus, encoding the orphan nuclear receptor Nor-1, are associated with enhanced  $\beta$ -cell function in non-diabetic subjects. *BMC Med Genet* 10:77
  36. Smith AG, Luk N, Newton RA, Roberts DW, Sturm RA, Muscat GE 2008 Melanocortin-1 receptor signaling markedly induces the expression of the NR4A nuclear receptor subgroup in melanocytic cells. *J Biol Chem* 283:12564–12570
  37. Pearen MA, Ryall JG, Maxwell MA, Ohkura N, Lynch GS, Muscat GE 2006 The orphan nuclear receptor, NOR-1, is a target of  $\beta$ -adrenergic signaling in skeletal muscle. *Endocrinology* 147:5217–5227
  38. Rius J, Martínez-González J, Crespo J, Badimon L 2006 NOR-1 is involved in VEGF-induced endothelial cell growth. *Atherosclerosis* 184:276–282
  39. Wu X, Wang J, Cui X, Maianu L, Rhees B, Rosinski J, So WV, Willi SM, Osier MV, Hill HS, Page GP, Allison DB, Martin M, Garvey WT 2007 The effect of insulin on expression of genes and biochemical pathways in human skeletal muscle. *Endocrine* 31:5–17
  40. Davis IJ, Lau LF 1994 Endocrine and neurogenic regulation of the orphan nuclear receptors Nur77 and Nurr-1 in the adrenal glands. *Mol Cell Biol* 14:3469–3483
  41. Bandoh S, Tsukada T, Maruyama K, Ohkura N, Yamaguchi K 1995 Gene expression of NOR-1, a neuron-derived orphan receptor, is inducible in neuronal and other cell lineages in culture. *Mol Cell Endocrinol* 115:227–230
  42. Lim RW, Zhu CY, Stringer B 1995 Differential regulation of primary response gene expression in skeletal muscle cells through multiple signal transduction pathways. *Biochim Biophys Acta* 1266:91–100
  43. Maruyama K, Tsukada T, Bandoh S, Sasaki K, Ohkura N, Yamaguchi K 1995 Expression of NOR-1 and its closely related members of the steroid/thyroid hormone receptor superfamily in human neuroblastoma cell lines. *Cancer Lett* 96:117–122
  44. Bandoh S, Tsukada T, Maruyama K, Ohkura N, Yamaguchi K 1997 Mechanical agitation induces gene expression of NOR-1 and its closely related orphan nuclear receptors in leukemic cell lines. *Leukemia* 11:1453–1458
  45. Mahoney DJ, Parise G, Melov S, Safdar A, Tarnopolsky MA 2005 Analysis of global mRNA expression in human skeletal muscle during recovery from endurance exercise. *FASEB J* 19:1498–1500
  46. Miyakoshi J, Tsukada T, Tachiiri S, Bandoh S, Yamaguchi K, Takebe H 1998 Enhanced NOR-1 gene expression by exposure of Chinese hamster cells to high-density 50 Hz magnetic fields. *Mol Cell Biochem* 181:191–195
  47. Lau LF, Nathans D 1987 Expression of a set of growth-related immediate early genes in BALB/c 3T3 cells: coordinate regulation with c-fos or c-myc. *Proc Natl Acad Sci USA* 84:1182–1186
  48. Maxwell MA, Muscat GE 2006 The NR4A subgroup: immediate early response genes with pleiotropic physiological roles. *Nucl Recept Signal* 4:e002
  49. Myers SA, Eriksson N, Burow R, Wang SC, Muscat GE 2009  $\beta$ -Adrenergic signaling regulates NR4A nuclear receptor and metabolic gene expression in multiple tissues. *Mol Cell Endocrinol* 309:101–108
  50. Arenander AT, de Vellis J, Herschman HR 1989 Induction of c-fos and TIS genes in cultured rat astrocytes by neurotransmitters. *J Neurosci Res* 24:107–114
  51. Bing GY, Filer D, Miller JC, Stone EA 1991 Noradrenergic activation of immediate early genes in rat cerebral cortex. *Brain Res Mol Brain Res* 11:43–46
  52. Blaak EE, Van Baak MA, Kemerink GJ, Pakbiers MT, Heidendal GA, Saris WH 1994  $\beta$ -Adrenergic stimulation of energy expenditure and forearm skeletal muscle metabolism in lean and obese men. *Am J Physiol Endocrinol Metab* 267:E306–E315
  53. Simonsen L, Bülow J, Madsen J, Christensen NJ 1992 Thermogenic response to epinephrine in the forearm and abdominal subcutaneous adipose tissue. *Am J Physiol Endocrinol Metab* 263:E850–E855
  54. Hagström-Toft E, Enoksson S, Moberg E, Bolinder J, Arner P 1998  $\beta$ -Adrenergic regulation of lipolysis and blood flow in human skeletal muscle in vivo. *Am J Physiol Endocrinol Metab* 275:E909–E916
  55. Bachman ES, Dhillon H, Zhang CY, Cinti S, Bianco AC, Kobilka BK, Lowell BB 2002  $\beta$ AR signaling required for diet-induced thermogenesis and obesity resistance. *Science* 297:843–845
  56. Pearen MA, Myers SA, Raichur S, Ryall JG, Lynch GS, Muscat GE 2008 The orphan nuclear receptor, NOR-1, a target of  $\beta$ -adrenergic signaling, regulates gene expression that controls oxidative metabolism in skeletal muscle. *Endocrinology* 149:2853–2865
  57. Chao LC, Zhang Z, Pei L, Saito T, Tontonoz P, Pilch PF 2007 Nur77 coordinately regulates expression of genes linked to glucose metabolism in skeletal muscle. *Mol Endocrinol* 21:2152–2163
  58. Maxwell MA, Cleasby ME, Harding A, Stark A, Cooney GJ, Muscat GE 2005 Nur77 regulates lipolysis in skeletal muscle cells. Evidence for cross-talk between the  $\beta$ -adrenergic and an orphan nuclear hormone receptor pathway. *J Biol Chem* 280:12573–12584
  59. Kanzleiter T, Wilks D, Preston E, Ye J, Frangioudakis G, Cooney GJ 2009 Regulation of the nuclear hormone receptor nur77 in muscle: influence of exercise-activated pathways in vitro and obesity in vivo. *Biochim Biophys Acta* 1792:777–782
  60. Christensen NJ, Galbo H 1983 Sympathetic nervous activity during exercise. *Annu Rev Physiol* 45:139–153
  61. Shin HJ, Lee BH, Yeo MG, Oh SH, Park JD, Park KK, Chung JH, Moon CK, Lee MO 2004 Induction of orphan nuclear receptor Nur77 gene expression and its role in cadmium-induced apoptosis in lung. *Carcinogenesis* 25:1467–1475
  62. Pirih FQ, Nervina JM, Pham L, Aghaloo T, Tetradis S 2003 Parathyroid hormone induces the nuclear orphan receptor NOR-1 in osteoblasts. *Biochem Biophys Res Commun* 306:144–150
  63. Lee MK, Nikodem VM 2004 Differential role of ERK in cAMP-



- induced Nurrl expression in N2A and C6 cells. *Neuroreport* 15: 99–102
64. Rius J, Martinez-González J, Crespo J, Badimon L 2004 Involvement of neuron-derived orphan receptor-1 (NOR-1) in LDL-induced mitogenic stimulus in vascular smooth muscle cells: role of CREB. *Arterioscler Thromb Vasc Biol* 24:697–702
  65. Kanzleiter T, Schneider T, Walter I, Bolze F, Eickhorst C, Heldmaier G, Klaus S, Klingenspor M 2005 Evidence for Nr4a1 as a cold-induced effector of brown fat thermogenesis. *Physiol Genomics* 24:37–44
  66. Kumar N, Liu D, Wang H, Robidoux J, Collins S 2008 Orphan nuclear receptor NOR-1 enhances 3',5'-cyclic adenosine 5'-monophosphate-dependent uncoupling protein-1 gene transcription. *Mol Endocrinol* 22:1057–1064
  67. Fagher B, Liedholm H, Monti M, Moritz U 1986 Thermogenesis in human skeletal muscle as measured by direct microcalorimetry and muscle contractile performance during  $\beta$ -adrenoceptor blockade. *Clin Sci (Colch)* 70:435–441
  68. Hoeks J, van Baak MA, Hesselink MK, Hul GB, Vidal H, Saris WH, Schrauwen P 2003 Effect of  $\beta$ 1- and  $\beta$ 2-adrenergic stimulation on energy expenditure, substrate oxidation, and UCP3 expression in humans. *Am J Physiol Endocrinol Metab* 285:E775–E782
  69. Lee SL, Wesselschmidt RL, Linette GP, Kanagawa O, Russell JH, Milbrandt J 1995 Unimpaired thymic and peripheral T cell death in mice lacking the nuclear receptor NGFI-B (Nur77). *Science* 269:532–535
  70. Zhan Y, Du X, Chen H, Liu J, Zhao B, Huang D, Li G, Xu Q, Zhang M, Weimer BC, Chen D, Cheng Z, Zhang L, Li Q, Li S, Zheng Z, Song S, Huang Y, Ye Z, Su W, Lin SC, Shen Y, Wu Q 2008 Cytosporone B is an agonist for nuclear orphan receptor Nur77. *Nat Chem Biol* 4:548–556
  71. Lessard SJ, Rivas DA, Chen ZP, van Denderen BJ, Watt MJ, Koch LG, Britton SL, Kemp BE, Hawley JA 2009 Impaired skeletal muscle  $\beta$ -adrenergic activation and lipolysis are associated with whole-body insulin resistance in rats bred for low intrinsic exercise capacity. *Endocrinology* 150:4883–4891
  72. Oita RC, Mazzatti DJ, Lim FL, Powell JR, Merry BJ 2009 Whole-genome microarray analysis identifies up-regulation of Nr4a nuclear receptors in muscle and liver from diet-restricted rats. *Mech Ageing Dev* 130:240–247
  73. Pei L, Waki H, Vaitheesvaran B, Wilpitz DC, Kurland IJ, Tontonoz P 2006 NR4A orphan nuclear receptors are transcriptional regulators of hepatic glucose metabolism. *Nat Med* 12:1048–1055
  74. Pols TW, Ottenhoff R, Vos M, Levels JH, Quax PH, Meijers JC, Pannekoek H, Groen AK, de Vries CJ 2008 Nur77 modulates hepatic lipid metabolism through suppression of SREBP1c activity. *Biochem Biophys Res Commun* 366:910–916
  75. Susini S, Roche E, Prentki M, Schlegel W 1998 Glucose and glucocorticoid peptides synergize to induce c-fos, c-jun, junB, zif-268, and nur-77 gene expression in pancreatic  $\beta$ (INS-1) cells. *FASEB J* 12:1173–1182
  76. Roche E, Buteau J, Aniento I, Reig JA, Soria B, Prentki M 1999 Palmitate and oleate induce the immediate-early response genes c-fos and nur-77 in the pancreatic  $\beta$ -cell line INS-1. *Diabetes* 48: 2007–2014
  77. Collins S, Cao W, Robidoux J 2004 Learning new tricks from old dogs:  $\beta$ -adrenergic receptors teach new lessons on firing up adipose tissue metabolism. *Mol Endocrinol* 18:2123–2131
  78. Fu M, Sun T, Bookout AL, Downes M, Yu RT, Evans RM, Mangelsdorf DJ 2005 A nuclear receptor atlas: 3T3-L1 adipogenesis. *Mol Endocrinol* 19:2437–2450
  79. Fumoto T, Yamaguchi T, Hirose F, Osumi T 2007 Orphan nuclear receptor Nur77 accelerates the initial phase of adipocyte differentiation in 3T3-L1 cells by promoting mitotic clonal expansion. *J Biochem* 141:181–192
  80. Chao LC, Bensinger SJ, Villanueva CJ, Wroblewski K, Tontonoz P 2008 Inhibition of adipocyte differentiation by Nur77, Nurrl, and Nor1. *Mol Endocrinol* 22:2596–2608
  81. Au WS, Payne VA, O'Rahilly S, Rochford JJ 2008 The NR4A family of orphan nuclear receptors are not required for adipogenesis. *Int J Obes (Lond)* 32:388–392
  82. Tontonoz P, Hu E, Spiegelman BM 1994 Stimulation of adipogenesis in fibroblasts by PPAR $\gamma$ 2, a lipid-activated transcription factor. *Cell* 79:1147–1156
  83. Lafontan M, Berlan M 1993 Fat cell adrenergic receptors and the control of white and brown fat cell function. *J Lipid Res* 34:1057–1091
  84. Nonogaki K, Kaji T, Ohba Y, Sumii M, Wakameda M, Tamari T 2009 Serotonin 5-HT2C receptor-independent expression of hypothalamic NOR1, a novel modulator of food intake and energy balance, in mice. *Biochem Biophys Res Commun* 386:311–315
  85. Nahon JL 2006 The melanocortins and melanin-concentrating hormone in the central regulation of feeding behavior and energy homeostasis. *C R Biol* 329:623–638; discussion 653–625
  86. Yaswen L, Diehl N, Brennan MB, Hochgeschwender U 1999 Obesity in the mouse model of pro-opiomelanocortin deficiency responds to peripheral melanocortin. *Nat Med* 5:1066–1070
  87. Martínez-González J, Badimon L 2005 The NR4A subfamily of nuclear receptors: new early genes regulated by growth factors in vascular cells. *Cardiovasc Res* 65:609–618
  88. Pols TW, Bonta PI, de Vries CJ 2007 NR4A nuclear orphan receptors: protective in vascular disease? *Curr Opin Lipidol* 18:515–520
  89. Bonta PI, van Tiel CM, Vos M, Pols TW, van Thienen JV, Ferreira V, Arkenbout EK, Seppen J, Spek CA, van der Poll T, Pannekoek H, de Vries CJ 2006 Nuclear receptors Nur77, Nurrl, and NOR-1 expressed in atherosclerotic lesion macrophages reduce lipid loading and inflammatory responses. *Arterioscler Thromb Vasc Biol* 26:2288–2294
  90. Arkenbout EK, de Waard V, van Bragt M, van Achterberg TA, Grimbergen JM, Pichon B, Pannekoek H, de Vries CJ 2002 Protective function of transcription factor TR3 orphan receptor in atherosclerosis: decreased lesion formation in carotid artery ligation model in TR3 transgenic mice. *Circulation* 106:1530–1535
  91. Codina A, Benoit G, Gooch JT, Neuhaus D, Perlmann T, Schwabe JW 2004 Identification of a novel co-regulator interaction surface on the ligand binding domain of Nurrl using NMR footprinting. *J Biol Chem* 279:53338–53345
  92. Ordentlich P, Yan Y, Zhou S, Heyman RA 2003 Identification of the antineoplastic agent 6-mercaptopurine as an activator of the orphan nuclear hormone receptor Nurrl. *J Biol Chem* 278: 24791–24799
  93. Wansa KD, Muscat GE 2005 TRAP220 is modulated by the antineoplastic agent 6-Mercaptopurine, and mediates the activation of the NR4A subgroup of nuclear receptors. *J Mol Endocrinol* 34:835–848
  94. Cho SD, Yoon K, Chintharlapalli S, Abdelrahim M, Lei P, Hamilton S, Khan S, Ramaiah SK, Safe S 2007 Nur77 agonists induce proapoptotic genes and responses in colon cancer cells through nuclear receptor-dependent and nuclear receptor-independent pathways. *Cancer Res* 67:674–683
  95. Liu ZG, Smith SW, McLaughlin KA, Schwartz LM, Osborne BA 1994 Apoptotic signals delivered through the T-cell receptor of a T-cell hybrid require the immediate-early gene nur77. *Nature* 367: 281–284
  96. Qin C, Morrow D, Stewart J, Spencer K, Porter W, Smith III R, Phillips T, Abdelrahim M, Samudio I, Safe S 2004 A new class of peroxisome proliferator-activated receptor  $\gamma$  (PPAR $\gamma$ ) agonists that inhibit growth of breast cancer cells: 1,1-bis(3'-indolyl)-1-(p-substituted phenyl)methanes. *Mol Cancer Ther* 3:247–260
  97. Kagaya S, Ohkura N, Tsukada T, Miyagawa M, Sugita Y, Tsumimoto G, Matsumoto K, Saito H, Hashida R 2005 Prostaglandin A2 acts as a transactivator for NOR1 (NR4A3) within the nuclear receptor superfamily. *Biol Pharm Bull* 28:1603–1607



98. Dubois C, Hengerer B, Mattes H 2006 Identification of a potent agonist of the orphan nuclear receptor Nurr1. *Chem Med Chem* 1:955–958
99. Hintermann S, Chiesi M, von Krosigk U, Mathé D, Felber R, Hengerer B 2007 Identification of a series of highly potent activators of the Nurr1 signaling pathway. *Bioorg Med Chem Lett* 17:193–196
100. Zetterström RH, Solomin L, Jansson L, Hoffer BJ, Olson L, Perlmann T 1997 Dopamine neuron agenesis in Nurr1-deficient mice. *Science* 276:248–250
101. Le W, Conneely OM, He Y, Jankovic J, Appel SH 1999 Reduced Nurr1 expression increases the vulnerability of mesencephalic dopamine neurons to MPTP-induced injury. *J Neurochem* 73:2218–2221
102. Eells JB, Lipska BK, Yeung SK, Mislér JA, Nikodem VM 2002 Nurr1-null heterozygous mice have reduced mesolimbic and mesocortical dopamine levels and increased stress-induced locomotor activity. *Behav Brain Res* 136:267–275
103. Bassett MH, Suzuki T, Sasano H, White PC, Rainey WE 2004 The orphan nuclear receptors NURR1 and NGFI-B regulate adrenal aldosterone production. *Mol Endocrinol* 18:279–290
104. Nogueira EF, Vargas CA, Otis M, Gallo-Payet N, Bollag WB, Rainey WE 2007 Angiotensin-II acute regulation of rapid response genes in human, bovine, and rat adrenocortical cells. *J Mol Endocrinol* 39:365–374
105. Bourhis E, Maheux J, Rouillard C, Lévesque D 2008 Extracellular signal-regulated kinases (ERK) and protein kinase C (PKC) activities are involved in the modulation of Nur77 and Nor-1 expression by dopaminergic drugs. *J Neurochem* 106:875–888
106. Mix KS, Attur MG, Al-Mussawir H, Abramson SB, Brinckerhoff CE, Murphy EP 2007 Transcriptional repression of matrix metalloproteinase gene expression by the orphan nuclear receptor NURR1 in cartilage. *J Biol Chem* 282:9492–9504
107. Martínez-González J, Rius J, Castelló A, Cases-Langhoff C, Badimon L 2003 Neuron-derived orphan receptor-1 (NOR-1) modulates vascular smooth muscle cell proliferation. *Circ Res* 92:96–103
108. Martorell L, Martínez-González J, Crespo J, Calvayrac O, Badimon L 2007 Neuron-derived orphan receptor-1 (NOR-1) is induced by thrombin and mediates vascular endothelial cell growth. *J Thromb Haemost* 5:1766–1773
109. Song KH, Park JI, Lee MO, Soh J, Lee K, Choi HS 2001 LH induces orphan nuclear receptor Nur77 gene expression in testicular Leydig cells. *Endocrinology* 142:5116–5123
110. Wu Y, Ghosh S, Nishi Y, Yanase T, Nawata H, Hu Y 2005 The orphan nuclear receptors NURR1 and NGFI-B modulate aromatase gene expression in ovarian granulosa cells: a possible mechanism for repression of aromatase expression upon luteinizing hormone surge. *Endocrinology* 146:237–246
111. Havelock JC, Smith AL, Seely JB, Dooley CA, Rodgers RJ, Rainey WE, Carr BR 2005 The NGFI-B family of transcription factors regulates expression of 3 $\beta$ -hydroxysteroid dehydrogenase type 2 in the human ovary. *Mol Hum Reprod* 11:79–85
112. Fahrner TJ, Carroll SL, Milbrandt J 1990 The NGFI-B protein, an inducible member of the thyroid/steroid receptor family, is rapidly modified posttranslationally. *Mol Cell Biol* 10:6454–6459
113. Williams GT, Lau LF 1993 Activation of the inducible orphan receptor gene nur77 by serum growth factors: dissociation of immediate-early and delayed-early responses. *Mol Cell Biol* 13:6124–6136
114. Katagiri Y, Hirata Y, Milbrandt J, Guroff G 1997 Differential regulation of the transcriptional activity of the orphan nuclear receptor NGFI-B by membrane depolarization and nerve growth factor. *J Biol Chem* 272:31278–31284
115. Pei L, Castrillo A, Chen M, Hoffmann A, Tontonoz P 2005 Induction of NR4A orphan nuclear receptor expression in macrophages in response to inflammatory stimuli. *J Biol Chem* 280:29256–29262
116. Borghaei RC, Sinai RS, Mochan E, Pease EA 1998 Induction of mitogen-inducible nuclear orphan receptor by interleukin 1 in human synovial and gingival fibroblasts. *Biochem Biophys Res Commun* 251:334–338
117. Crawford PA, Sadvovsky Y, Woodson K, Lee SL, Milbrandt J 1995 Adrenocortical function and regulation of the steroid 21-hydroxylase gene in NGFI-B-deficient mice. *Mol Cell Biol* 15:4331–4316
118. Pei L, Castrillo A, Tontonoz P 2006 Regulation of macrophage inflammatory gene expression by the orphan nuclear receptor Nur77. *Mol Endocrinol* 20:786–794
119. Chan RK, Brown ER, Ericsson A, Kovács KJ, Sawchenko PE 1993 A comparison of two immediate-early genes, c-fos and NGFI-B, as markers for functional activation in stress-related neuroendocrine circuitry. *J Neurosci* 13:5126–5138
120. Hazel TG, Misra R, Davis JJ, Greenberg ME, Lau LF 1991 Nur77 is differentially modified in PC12 cells upon membrane depolarization and growth factor treatment. *Mol Cell Biol* 11:3239–3246
121. Yang G, Zhang G, Pittelkow MR, Ramoni M, Tsao H 2006 Expression profiling of UVB response in melanocytes identifies a set of p53-target genes. *J Invest Dermatol* 126:2490–2506
122. Song KH, Lee K, Choi HS 2002 Endocrine disrupter bisphenol A induces orphan nuclear receptor Nur77 gene expression and steroidogenesis in mouse testicular Leydig cells. *Endocrinology* 143:2208–2215
